# Supplementary material for: Polycomb complexes in normal and malignant hematopoiesis
Source: PubMed Central journal article supplement — J Cell Biol. 2019 Jan 7;218(1):55–69. doi: 10.1083/jcb.201808028 (PMC6314559; doi:10.1083/jcb.201808028), 2019-01-07
Supplement: JCB_201808028_sm.pdf [file JCB_201808028_sm.pdf]

## Supplemental material

Di Carlo et al., <https://doi.org/10.1083/jcb.201808028>

Table S1. Defects in PcG factors associated with oncogenic functions

| Factor       | Alteration                                    | Disease                                                                                              | Reference                                                                                                                                                                                          |
|--------------|-----------------------------------------------|------------------------------------------------------------------------------------------------------|----------------------------------------------------------------------------------------------------------------------------------------------------------------------------------------------------|
| <i>Bmi-1</i> | Overexpression (protein)                      | B and T cell lymphomas (mouse), MCL (human), DLBCL (human), B cell lymphoma (human), and MDS (human) | (Alkema et al., 1997; Jacobs et al., 1999; Beà et al., 2001; van Kemenade et al., 2001; Mihara et al., 2006; van Galen et al., 2007)                                                               |
|              | Overexpression (RNA)                          | Hodgkin's disease (human), AML (human), CML (human), and pediatric ALL (human)                       | (Raaphorst et al., 2000; Sawa et al., 2005; Mohty et al., 2007; Saudy et al., 2014; Peng et al., 2017)                                                                                             |
| <i>Cbx7</i>  | Overexpression (protein)                      | T-cell lymphomas (mouse) and FL (human)                                                              | (Scott et al., 2007)                                                                                                                                                                               |
| <i>Ezh2</i>  | Overexpressed (protein)/gene amplified        | MCL (human) and B cell lymphoma (human)                                                              | (van Kemenade et al., 2001; Visser et al., 2001; Okosun et al., 2014)                                                                                                                              |
|              | GOF mutations Y641F/N/S/H/C, A677G, and A687V | DLBCL (human) and FL (human)                                                                         | (Morin et al., 2010; Sneeringer et al., 2010; Yap et al., 2011; Majer et al., 2012; McCabe et al., 2012; Béguelin et al., 2013, 2016; Bödör et al., 2013; Caganova et al., 2013; Ott et al., 2014) |

MCL, mantle cell lymphoma.

Table S2. Defects in PcG factors associated with tumor-suppressive functions

| Factor        | Alteration                                                      | Disease                                                                                     | Reference                                                                                                                                                                                                   |
|---------------|-----------------------------------------------------------------|---------------------------------------------------------------------------------------------|-------------------------------------------------------------------------------------------------------------------------------------------------------------------------------------------------------------|
| <i>Bmi-1</i>  | Deletion                                                        | PMF (mouse)                                                                                 | (Oguro et al., 2012)                                                                                                                                                                                        |
| <i>Phc1</i>   | Deletion/down-regulation (RNA)                                  | ALL (mouse and human)                                                                       | (Tokimasa et al., 2001)                                                                                                                                                                                     |
| <i>Bcor</i>   | Deletion/down-regulation (RNA)                                  | MDS (human) and AML (human)                                                                 | (Grossmann et al., 2011; Damm et al., 2013)                                                                                                                                                                 |
| <i>Bcor1</i>  | Deletion/down-regulation (RNA)                                  | MDS (human) and AML (human)                                                                 | (Li et al., 2011; Damm et al., 2013)                                                                                                                                                                        |
| <i>Ezh2</i>   | Deletion/down-regulation (RNA)/missense mutations/LOF mutations | MDS (mouse), MDS/MPN (human), AML (human), CMML (human), T-ALL (human), and ETP ALL (human) | (Ernst et al., 2010; Nikoloski et al., 2010; Bejar et al., 2011; Ntziachristos et al., 2012; Puda et al., 2012; Simon et al., 2012; Zhang et al., 2012; Mochizuki-Kashio et al., 2015; Gangat et al., 2018) |
| <i>Suz12</i>  | Deletion/down-regulation (RNA)/missense mutations/LOF mutations | MDS/MPN (human), AML (human), T-ALL (human), and ETP ALL (human)                            | (Brecqueville et al., 2012; Ntziachristos et al., 2012; Puda et al., 2012; Score et al., 2012; Zhang et al., 2012)                                                                                          |
| <i>Eed</i>    | Deletion/down-regulation (RNA)/missense mutations/LOF mutations | MDS (mouse), leukemia (mouse), MDS/MPN (human), ETP ALL (human), and CMML (human)           | (Score et al., 2012; Ueda et al., 2012, 2016; Zhang et al., 2012)                                                                                                                                           |
| <i>Jarid2</i> | Deletion/down-regulation (RNA)/missense mutations               | MDS/MPN (human), AML (human), T-ALL (human), and leukemia (human)                           | (Puda et al., 2012; Score et al., 2012; Simon et al., 2012; Su et al., 2015)                                                                                                                                |
| <i>Aebp2</i>  | Deletion/down-regulation (RNA)                                  | MDS/MPN (human) and AML (human)                                                             | (Puda et al., 2012)                                                                                                                                                                                         |

CMML, chronic myelomonocytic leukemia; T-ALL, T-cell ALL.

## References

- Alkema, M.J., H. Jacobs, M. van Lohuizen, and A. Berns. 1997. Perturbation of B and T cell development and predisposition to lymphomagenesis in Emu Bmi1 transgenic mice require the Bmi1 RING finger. *Oncogene*. 15:899–910. <https://doi.org/10.1038/sj.onc.1201262>
- Beà, S., F. Tort, M. Pinyol, X. Puig, L. Hernández, S. Hernández, P.L. Fernández, M. van Lohuizen, D. Colomer, and E. Campo. 2001. BMI-1 gene amplification and overexpression in hematological malignancies occur mainly in mantle cell lymphomas. *Cancer Res*. 61:2409–2412.
- Béguelin, W., R. Popovic, M. Teater, Y. Jiang, K.L. Bunting, M. Rosen, H. Shen, S.N. Yang, L. Wang, T. Ezponda, et al. 2013. EZH2 is required for germinal center formation and somatic EZH2 mutations promote lymphoid transformation. *Cancer Cell*. 23:677–692. <https://doi.org/10.1016/j.ccr.2013.04.011>
- Béguelin, W., M. Teater, M.D. Gearhart, M.T. Calvo Fernández, R.L. Goldstein, M.G. Cárdenas, K. Hatzi, M. Rosen, H. Shen, C.M. Corcoran, et al. 2016. EZH2 and BCL6 Cooperate to Assemble CBX8-BCOR Complex to Repress Bivalent Promoters, Mediate Germinal Center Formation and Lymphomagenesis. *Cancer Cell*. 30:197–213. <https://doi.org/10.1016/j.ccell.2016.07.006>
- Bejar, R., K. Stevenson, O. Abdel-Wahab, N. Galili, B. Nilsson, G. Garcia-Manero, H. Kantarjian, A. Raza, R.L. Levine, D. Neuberg, and B.L. Ebert. 2011. Clinical effect of point mutations in myelodysplastic syndromes. *N. Engl. J. Med*. 364:2496–2506. <https://doi.org/10.1056/NEJMoa1013343>
- Bödör, C., V. Grossmann, N. Popov, J. Okosun, C. O'Riain, K. Tan, J. Marzec, S. Araf, J. Wang, A.M. Lee, et al. 2013. EZH2 mutations are frequent and represent an early event in follicular lymphoma. *Blood*. 122:3165–3168. <https://doi.org/10.1182/blood-2013-04-496893>
- Brecqueville, M., J. Rey, F. Bertucci, E. Coppin, P. Finetti, N. Carbuca, N. Cervera, V. Gelsi-Boyer, C. Arnoulet, O. Gisserot, et al. 2012. Mutation analysis of *ASXL1*, *CBL*, *DNMT3A*, *IDH1*, *IDH2*, *JAK2*, *MPL*, *NFI*, *SF3B1*, *SUZ12*, and *TET2* in myeloproliferative neoplasms. *Genes Chromosomes Cancer*. 51:743–755. <https://doi.org/10.1002/gcc.21960>
- Caganova, M., C. Carrisi, G. Varano, F. Mainoldi, F. Zanardi, P.-L. Germain, L. George, F. Alberghini, L. Ferrarini, A.K. Talukder, et al. 2013. Germinal center dysregulation by histone methyltransferase EZH2 promotes lymphomagenesis. *J. Clin. Invest*. 123:5009–5022. <https://doi.org/10.1172/JCI70626>
- Damm, F., V. Chesnais, Y. Nagata, K. Yoshida, L. Scourzic, Y. Okuno, R. Itzykson, M. Sanada, Y. Shiraishi, V. Gelsi-Boyer, et al. 2013. BCOR and BCORL1 mutations in myelodysplastic syndromes and related disorders. *Blood*. 122:3169–3177. <https://doi.org/10.1182/blood-2012-11-469619>
- Ernst, T., A.J. Chase, J. Score, C.E. Hidalgo-Curtis, C. Bryant, A.V. Jones, K. Waghorn, K. Zoi, F.M. Ross, A. Reiter, et al. 2010. Inactivating mutations of the histone methyltransferase gene EZH2 in myeloid disorders. *Nat. Genet*. 42:722–726. <https://doi.org/10.1038/ng.621>
- Gangat, N., M. Mudreddy, T.L. Lasho, C.M. Finke, M. Nicolosi, N. Szuber, M.M. Patnaik, A. Pardananani, C.A. Hanson, R.P. Ketterling, and A. Tefferi. 2018. Mutations and prognosis in myelodysplastic syndromes: karyotype-adjusted analysis of targeted sequencing in 300 consecutive cases and development of a genetic risk model. *Am. J. Hematol*. 93:691–697. <https://doi.org/10.1002/ajh.25064>
- Grossmann, V., E. Tiacchi, A.B. Holmes, A. Kohlmann, M.P. Martelli, W. Kern, A. Spanhol-Rosseto, H.-U. Klein, M. Dugas, S. Schindela, et al. 2011. Whole-exome sequencing identifies somatic mutations of BCOR in acute myeloid leukemia with normal karyotype. *Blood*. 118:6153–6163. <https://doi.org/10.1182/blood-2011-07-365320>
- Jacobs, J.J.L., B. Scheijen, J.-W. Voncken, K. Kieboom, A. Berns, and M. van Lohuizen. 1999. Bmi-1 collaborates with c-Myc in tumorigenesis by inhibiting c-Myc-induced apoptosis via INK4a/ARF. *Genes Dev*. 13:2678–2690. <https://doi.org/10.1101/gad.13.20.2678>
- Li, M., R. Collins, Y. Jiao, P. Ouillette, D. Bixby, H. Erba, B. Vogelstein, K.W. Kinzler, N. Papadopoulos, and S.N. Malek. 2011. Somatic mutations in the transcriptional corepressor gene BCORL1 in adult acute myelogenous leukemia. *Blood*. 118:5914–5917. <https://doi.org/10.1182/blood-2011-05-356204>
- Majer, C.R., L. Jin, M.P. Scott, S.K. Knutson, K.W. Kuntz, H. Keilhack, J.J. Smith, M.P. Moyer, V.M. Richon, R.A. Copeland, and T.J. Wigle. 2012. A687V EZH2 is a gain-of-function mutation found in lymphoma patients. *FEBS Lett*. 586:3448–3451. <https://doi.org/10.1016/j.febslet.2012.07.066>
- McCabe, M.T., H.M. Ott, G. Ganji, S. Korenchuk, C. Thompson, G.S. Van Aller, Y. Liu, A.P. Graves, A. Della Pietra III, E. Diaz, et al. 2012. EZH2 inhibition as a therapeutic strategy for lymphoma with EZH2-activating mutations. *Nature*. 492:108–112. <https://doi.org/10.1038/nature11606>
- Mihara, K., M. Chowdhury, N. Nakajima, S. Hidani, A. Ihara, H. Hyodo, S. Yasunaga, Y. Takihara, and A. Kimura. 2006. Bmi-1 is useful as a novel molecular marker for predicting progression of myelodysplastic syndrome and patient prognosis. *Blood*. 107:305–308. <https://doi.org/10.1182/blood-2005-06-2393>
- Mochizuki-Kashio, M., K. Aoyama, G. Sashida, M. Oshima, T. Tomioka, T. Muto, C. Wang, and A. Iwama. 2015. Ezh2 loss in hematopoietic stem cells predisposes mice to develop heterogeneous malignancies in an Ezh1-dependent manner. *Blood*. 126:1172–1183. <https://doi.org/10.1182/blood-2015-03-634428>
- Mohty, M., A.S.M. Yong, R.M. Szydlo, J.F. Apperley, and J.V. Melo. 2007. The polycomb group BMI1 gene is a molecular marker for predicting prognosis of chronic myeloid leukemia. *Blood*. 110:380–383. <https://doi.org/10.1182/blood-2006-12-065599>
- Morin, R.D., N.A. Johnson, T.M. Severson, A.J. Mungall, J. An, R. Goya, J.E. Paul, M. Boyle, B.W. Woolcock, F. Kuchenbauer, et al. 2010. Somatic mutations altering EZH2 (Tyr641) in follicular and diffuse large B-cell lymphomas of germinal-center origin. *Nat. Genet*. 42:181–185. <https://doi.org/10.1038/ng.518>
- Nikoloski, G., S.M.C. Langemeijer, R.P. Kuiper, R. Knops, M. Massop, E.R.L.T.M. Tönnissen, A. van der Heijden, T.N. Scheele, P. Vandenberghe, T. de Witte, et al. 2010. Somatic mutations of the histone methyltransferase gene EZH2 in myelodysplastic syndromes. *Nat. Genet*. 42:665–667. <https://doi.org/10.1038/ng.620>
- Ntziachristos, P., A. Tsirigos, P. Van Vlierberghe, J. Nedjic, T. Trimarchi, M.S. Flaherty, D. Ferres-Marco, V. da Ros, Z. Tang, J. Siegle, et al. 2012. Genetic inactivation of the polycomb repressive complex 2 in T cell acute lymphoblastic leukemia. *Nat. Med*. 18:298–303. <https://doi.org/10.1038/nm.2651>
- Oguro, H., J. Yuan, S. Tanaka, S. Miyagi, M. Mochizuki-Kashio, H. Ichikawa, S. Yamazaki, H. Koseki, H. Nakauchi, and A. Iwama. 2012. Lethal myelofibrosis induced by *Bmi1*-deficient hematopoietic cells unveils a tumor suppressor function of the polycomb group genes. *J. Exp. Med*. 209:445–454. <https://doi.org/10.1084/jem.20111709>
- Okosun, J., C. Bödör, J. Wang, S. Araf, C.-Y. Yang, C. Pan, S. Boller, D. Cittaro, M. Bozek, S. Iqbal, et al. 2014. Integrated genomic analysis identifies recurrent mutations and evolution patterns driving the initiation and progression of follicular lymphoma. *Nat. Genet*. 46:176–181. <https://doi.org/10.1038/ng.2856>
- Ott, H.M., A.P. Graves, M.B. Pappalardi, M. Huddleston, W.S. Halsey, A.M. Hughes, A. Groy, E. Dul, Y. Jiang, Y. Bai, et al. 2014. A687V EZH2 is a driver of histone H3 lysine 27 (H3K27) hypertrimethylation. *Mol. Cancer Ther*. 13:3062–3073. <https://doi.org/10.1158/1535-7163.MCT-13-0876>
- Peng, H.-X., X.-D. Luo, Z.-Y. Luo, X.-H. Zhang, X.-Q. Luo, X. Chen, H. Jiang, and L. Xu. 2017. Upregulation of the proto-oncogene Bmi-1 predicts a poor prognosis in pediatric acute lymphoblastic leukemia. *BMC Cancer*. 17:76. <https://doi.org/10.1186/s12885-017-3049-3>
- Puda, A., J.D. Milosevic, T. Berg, T. Klampfl, A.S. Harutyunyan, B. Gisslinger, E. Rumi, D. Pietra, L. Malcovati, C. Elena, et al. 2012. Frequent deletions of JARID2 in leukemic transformation of chronic myeloid malignancies. *Am. J. Hematol*. 87:245–250. <https://doi.org/10.1002/ajh.22257>
- Raaphorst, F.M., F.J. van Kemenade, T. Blokzijl, E. Fieret, K.M. Hamer, D.P.E. Satijn, A.P. Otte, and C.J.L.M. Meijer. 2000. Coexpression of BMI-1 and EZH2 polycomb group genes in Reed-Sternberg cells of Hodgkin's disease. *Am. J. Pathol*. 157:709–715. [https://doi.org/10.1016/S0002-9440\(10\)64583-X](https://doi.org/10.1016/S0002-9440(10)64583-X)
- Saudy, N.S., I.M. Fawzy, E. Azmy, E.F. Goda, A. Eneen, and E.M. Abdul Salam. 2014. BMI1 gene expression in myeloid leukemias and its impact on prognosis. *Blood Cells Mol. Dis*. 53:194–198. <https://doi.org/10.1016/j.bcmd.2014.07.002>
- Sawa, M., K. Yamamoto, T. Yokozawa, H. Kiyoi, A. Hishida, T. Kajiguchi, M. Seto, A. Kohno, K. Kitamura, Y. Itoh, et al. 2005. BMI-1 is highly expressed in M0-subtype acute myeloid leukemia. *Int. J. Hematol*. 82:42–47. <https://doi.org/10.1532/IJH97.05013>
- Score, J., C. Hidalgo-Curtis, A.V. Jones, N. Winkelmann, A. Skinner, D. Ward, K. Zoi, T. Ernst, F. Stegelmann, K. Döhner, et al. 2012. Inactivation of polycomb repressive complex 2 components in myeloproliferative and myelodysplastic/myeloproliferative neoplasms. *Blood*. 119:1208–1213. <https://doi.org/10.1182/blood-2011-07-367243>
- Scott, C.L., J. Gil, E. Hernando, J. Teruya-Feldstein, M. Narita, D. Martínez, T. Visakorpi, D. Mu, C. Cordon-Cardo, G. Peters, et al. 2007. Role of the chromobox protein CBX7 in lymphomagenesis. *Proc. Natl. Acad. Sci. USA*. 104:5389–5394. <https://doi.org/10.1073/pnas.0608721104>
- Simon, C., J. Chagraoui, J. Krosli, P. Gendron, B. Wilhelm, S. Lemieux, G. Boucher, P. Chagnon, S. Drouin, R. Lambert, et al. 2012. A key role for EZH2 and associated genes in mouse and human adult T-cell acute leukemia. *Genes Dev*. 26:651–656. <https://doi.org/10.1101/gad.186411.111>

- Sneeringer, C.J., M.P. Scott, K.W. Kuntz, S.K. Knutson, R.M. Pollock, V.M. Richon, and R.A. Copeland. 2010. Coordinated activities of wild-type plus mutant EZH2 drive tumor-associated hypertrimethylation of lysine 27 on histone H3 (H3K27) in human B-cell lymphomas. *Proc. Natl. Acad. Sci. USA*. 107:20980–20985. <https://doi.org/10.1073/pnas.1012525107>
- Su, C.-L., T.-R. Deng, Z. Shang, and Y. Xiao. 2015. JARID2 inhibits leukemia cell proliferation by regulating CCND1 expression. *Int. J. Hematol.* 102:76–85. <https://doi.org/10.1007/s12185-015-1797-x>
- Tokimasa, S., H. Ohta, A. Sawada, Y. Matsuda, J.Y. Kim, S. Nishiguchi, J. Hara, and Y. Takihara. 2001. Lack of the Polycomb-group gene *rae28* causes maturation arrest at the early B-cell developmental stage. *Exp. Hematol.* 29:93–103. [https://doi.org/10.1016/S0301-472X\(00\)00620-2](https://doi.org/10.1016/S0301-472X(00)00620-2)
- Ueda, T., M. Sanada, H. Matsui, N. Yamasaki, Z.I. Honda, L.-Y. Shih, H. Mori, T. Inaba, S. Ogawa, and H. Honda. 2012. EED mutants impair polycomb repressive complex 2 in myelodysplastic syndrome and related neoplasms. *Leukemia*. 26:2557–2560. <https://doi.org/10.1038/leu.2012.146>
- Ueda, T., Y. Nakata, A. Nagamachi, N. Yamasaki, A. Kanai, Y. Sera, M. Sasaki, H. Matsui, Z. Honda, H. Oda, et al. 2016. Propagation of trimethylated H3K27 regulated by polycomb protein EED is required for embryogenesis, hematopoietic maintenance, and tumor suppression. *Proc. Natl. Acad. Sci. USA*. 113:10370–10375. <https://doi.org/10.1073/pnas.1600070113>
- van Galen, J.C., J.J.F. Muris, J.J. Oudejans, W. Vos, C.P.E. Giroth, G.J. Ossenkoppele, A.P. Otte, F.M. Raaphorst, and C.J.L.M. Meijer. 2007. Expression of the polycomb-group gene *BMI1* is related to an unfavourable prognosis in primary nodal DLBCL. *J. Clin. Pathol.* 60:167–172. <https://doi.org/10.1136/jcp.2006.038752>
- van Kemenade, F.J., F.M. Raaphorst, T. Blokzijl, E. Fieret, K.M. Hamer, D.P. Satiijn, A.P. Otte, and C.J. Meijer. 2001. Coexpression of *BMI-1* and *EZH2* polycomb-group proteins is associated with cycling cells and degree of malignancy in B-cell non-Hodgkin lymphoma. *Blood*. 97:3896–3901. <https://doi.org/10.1182/blood.V97.12.3896>
- Visser, H.P.J., M.J. Gunster, H.C. Kluin-Nelemans, E.M.M. Manders, F.M. Raaphorst, C.J.L.M. Meijer, R. Willemze, and A.P. Otte. 2001. The Polycomb group protein *EZH2* is upregulated in proliferating, cultured human mantle cell lymphoma. *Br. J. Haematol.* 112:950–958. <https://doi.org/10.1046/j.1365-2141.2001.02641.x>
- Yap, D.B., J. Chu, T. Berg, M. Schapira, S.-W.G. Cheng, A. Moradian, R.D. Morin, A.J. Mungall, B. Meissner, M. Boyle, et al. 2011. Somatic mutations at *EZH2* Y641 act dominantly through a mechanism of selectively altered PRC2 catalytic activity, to increase H3K27 trimethylation. *Blood*. 117:2451–2459. <https://doi.org/10.1182/blood-2010-11-321208>
- Zhang, J., L. Ding, L. Holmfeldt, G. Wu, S.L. Heatley, D. Payne-Turner, J. Easton, X. Chen, J. Wang, M. Rusch, et al. 2012. The genetic basis of early T-cell precursor acute lymphoblastic leukaemia. *Nature*. 481:157–163. <https://doi.org/10.1038/nature10725>
